# Supplementary material for: Are There Thresholds in Glioblastoma Cell Death Responses Triggered by Temozolomide?
Source: MDPI journal article supplement (doi:10.3390/ijms20071562), 2019-03-28
Supplement: s1 [file s1]

## Supplemental Material

### **Are there thresholds in glioblastoma cell death responses triggered by temozolomide?**

**Yang He and Bernd Kaina**

Institute of Toxicology, University Medical Center Mainz, Obere ZahlbacherStr. 67, D-55131 Mainz, Germany

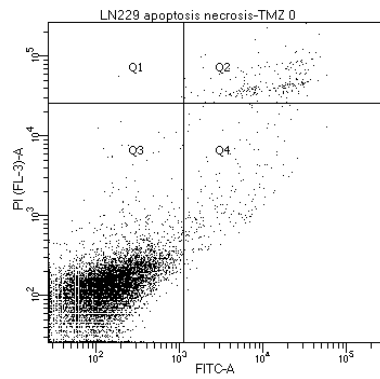

LN-229 control

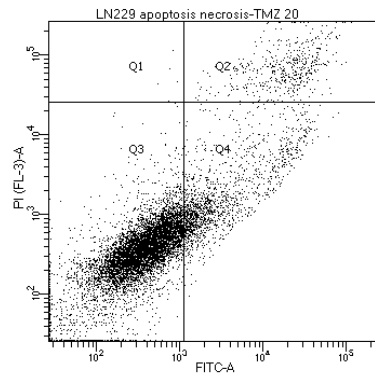

LN-229 TMZ 20  $\mu$ M

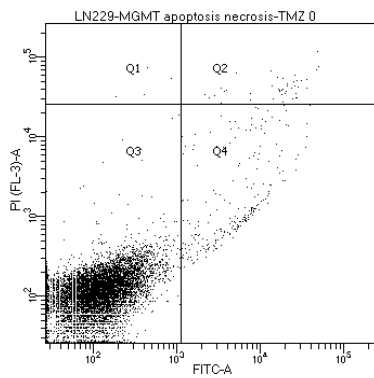

LN-229MGMT control

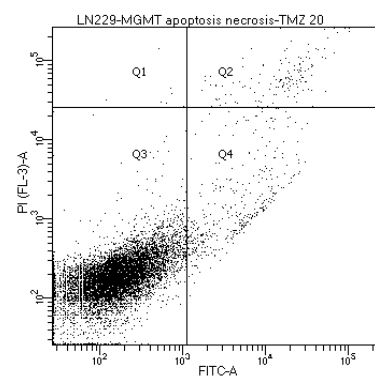

LN-229MGMT TMZ 20  $\mu$ M

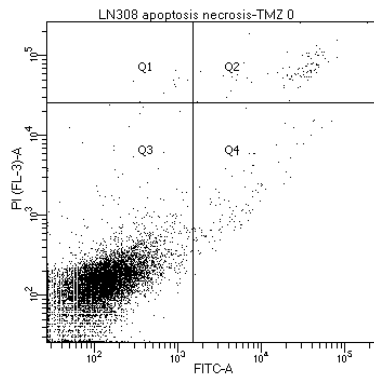

LN-308 control

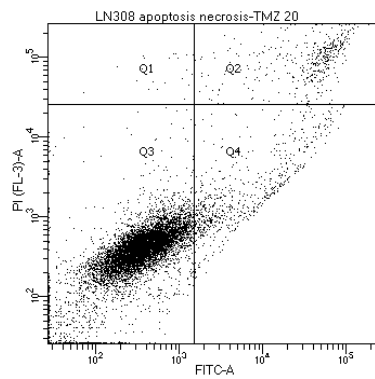

LN-308 TMZ 20  $\mu$ M

### Supplement Fig. S1

Apoptosis and necrosis measured by annexin V/propidium iodide (AV/PI) staining and flow cytometry. Cells were not treated (control) and treated with temozolomide.

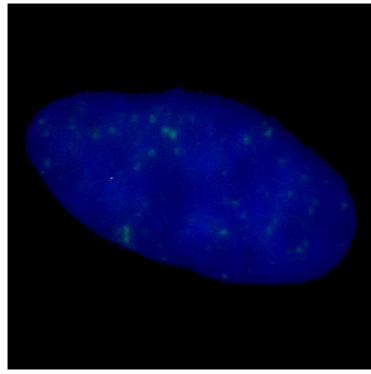

LN-229 control

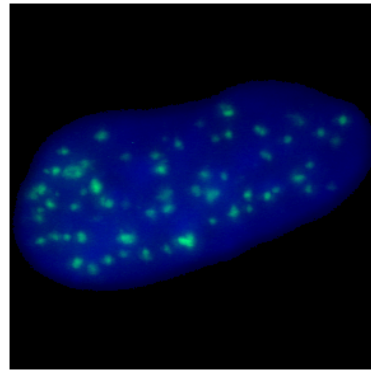

LN-229 TMZ 20  $\mu$ M

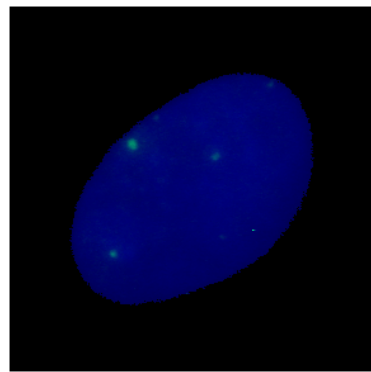

LN-229MGMT control

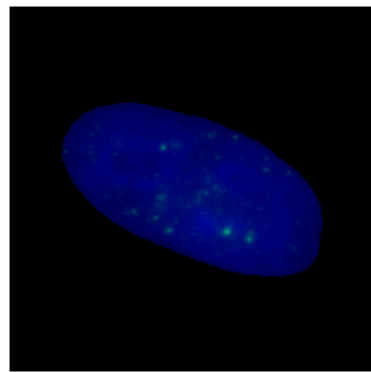

LN-229MGMT TMZ 20  $\mu$ M

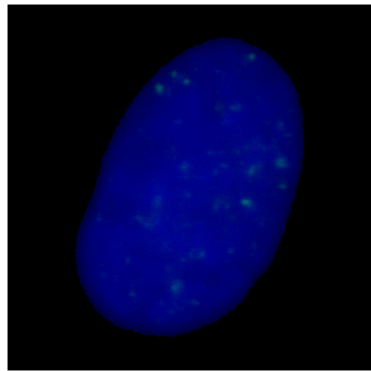

LN-308 control

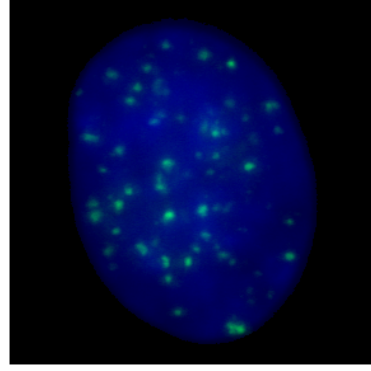

LN-308 TMZ 20  $\mu$ M

Supplement Fig. S2

$\gamma$ H2AX foci in LN-229, LN-229MGMT and LN-308 cells not treated (control) and treated with temozolomide.

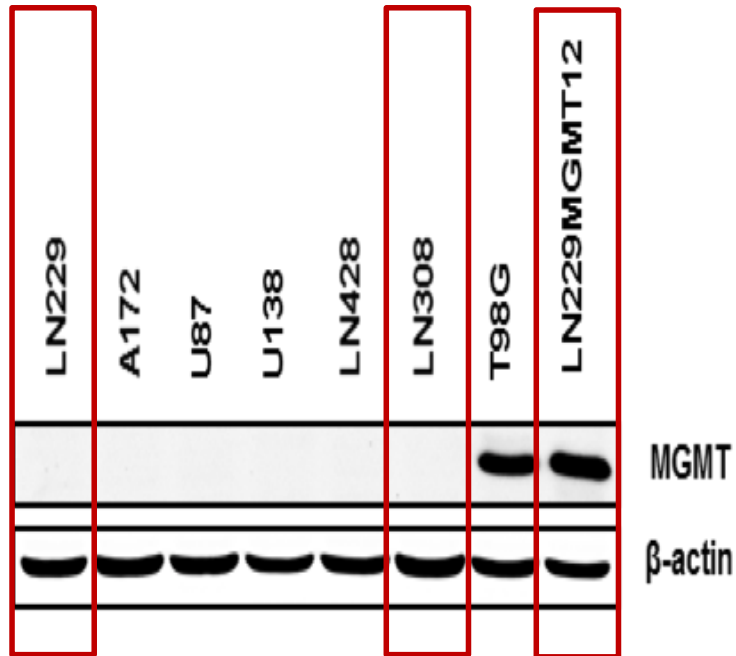

Supplement Fig. S3  
MGMT expression in different glioma cell lines determined by Western blot analysis.

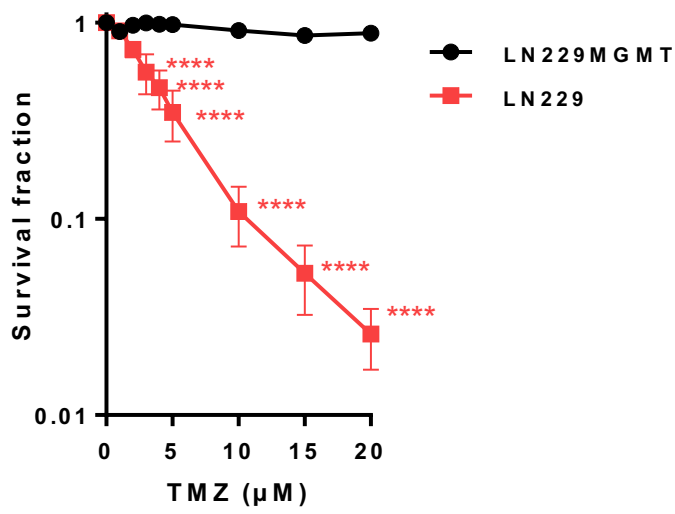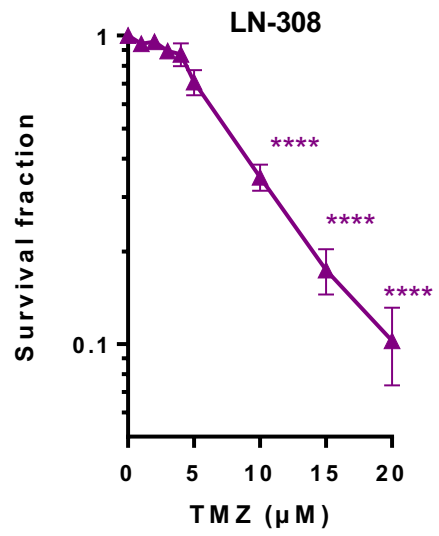

Supplement Fig. S4

Survival (relative colony formation) of LN-229, LN-229MGMT and LN-308 glioblastoma cells treated with temozolomide.
